# Supplementary material for: Development of dual ligand-targeted polymeric micelles as drug carriers for cancer therapy in vitro and in vivo
Source: Royal Society of Chemistry journal article supplement (doi:10.1039/c3tb21539c), 2014-01-01
Supplement: c3tb21539c1.pdf [file c3tb21539c1.pdf]

**Supporting Information:**

**Table S1.** Physicochemical properties of blank copolymer micelles.

| Sample | DS <sup>a</sup> (%) |     |     | Mean diameter<br>(nm) <sup>b</sup> | PI <sup>c</sup> | Zeta potential<br>(mV) |
|--------|---------------------|-----|-----|------------------------------------|-----------------|------------------------|
|        | Cholesterol         | FA  | NLS |                                    |                 |                        |
| CHGC   | 6.1                 | -   | -   | 228 ± 20.4                         | 0.212           | 13.28                  |
| FCHGC  | 6.1                 | 1.7 | -   | 237 ± 25.4                         | 0.245           | 10.57                  |
| NCHGC  | 6.1                 | -   | 3.9 | 215 ± 22.1                         | 0.218           | 12.17                  |
| NFCHGC | 6.1                 | 1.7 | 3.7 | 218 ± 23.7                         | 0.231           | 14.85                  |

<sup>a</sup> Degree of substitution which means the amount of conjugated groups per 100 sugar residues in the copolymer sample. <sup>b</sup> Measured by dynamic light scattering. <sup>c</sup> Polydispersity index.

**Table S2** Serum chemistry counts after intravenous treatment in Kunming mice (n=4)

| Groups        |          | AST<br>(U/L) | ALT<br>(U/L) | Total bilirubin<br>(μmol/L) | BUN<br>(mmol/L) | Creatinine<br>(μmol/L) |
|---------------|----------|--------------|--------------|-----------------------------|-----------------|------------------------|
| Normal saline |          | 212.0 ± 21.7 | 37.3 ± 4.51  | 1.25 ± 0.66                 | 8.78 ± 1.45     | 17.3 ± 7.82            |
| CHGC          | 30 mg/kg | 226.8 ± 17.5 | 38.2 ± 5.43  | 1.03 ± 0.25                 | 8.94 ± 0.63     | 19.8 ± 5.93            |
| FCHGC         | 30 mg/kg | 202.5 ± 15.0 | 39.5 ± 4.62  | 1.20 ± 0.34                 | 8.83 ± 0.20     | 17.8 ± 4.15            |
| NCHGC         | 30 mg/kg | 223.5 ± 14.1 | 37.2 ± 7.02  | 0.95 ± 0.28                 | 9.08 ± 1.81     | 17.5 ± 2.18            |
| NFCHGC        | 30 mg/kg | 211.7 ± 22.3 | 38.7 ± 4.18  | 1.12 ± 0.41                 | 9.12 ± 1.92     | 18.2 ± 4.40            |

**Table S3** Blood cell counts after intravenous treatment in Kunming mice (n=4)

| Groups        |          | WBC ( $10^9/L$ ) | RBC ( $10^{12}/L$ ) | Platelet ( $10^9/L$ ) |
|---------------|----------|------------------|---------------------|-----------------------|
| Normal saline |          | $5.47 \pm 1.12$  | $7.38 \pm 0.42$     | $1032.7 \pm 167.5$    |
| CHGC          | 30 mg/kg | $5.60 \pm 2.58$  | $6.97 \pm 1.52$     | $1061.0 \pm 136.1$    |
| FCHGC         | 30 mg/kg | $5.08 \pm 1.69$  | $7.54 \pm 1.21$     | $1051.1 \pm 178.1$    |
| NCHGC         | 30 mg/kg | $5.23 \pm 1.48$  | $7.84 \pm 0.38$     | $1099.3 \pm 161.7$    |
| NFCHGC        | 30 mg/kg | $5.32 \pm 0.95$  | $7.55 \pm 0.54$     | $1118.0 \pm 154.1$    |

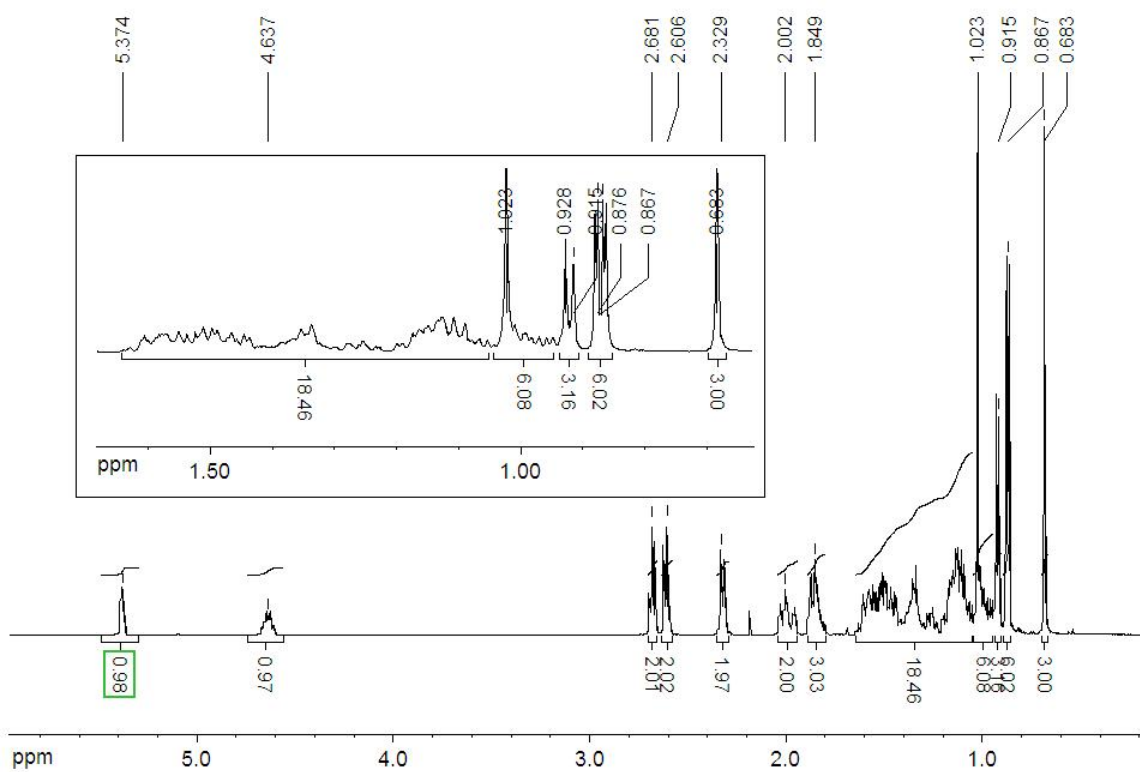

**Fig. S1.**  $^1\text{H}$  NMR spectrum of cholesterol succinate

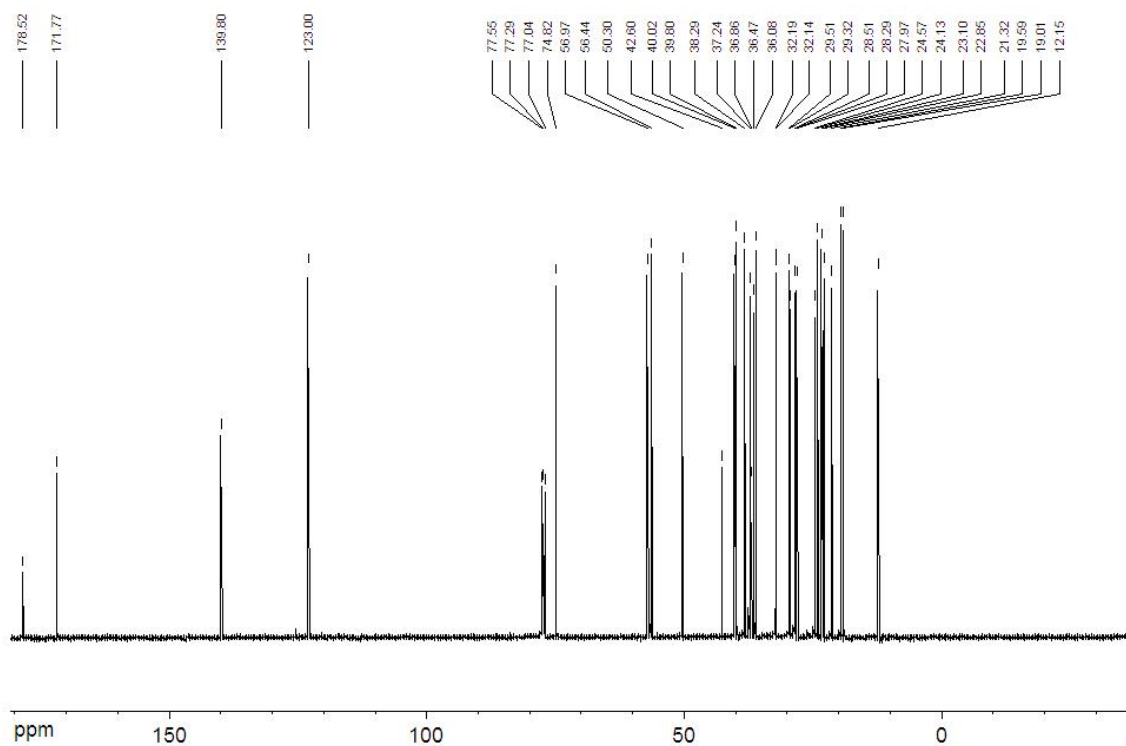

**Fig. S2.**  $^{13}\text{C}$  NMR spectrum of cholesterol succinate

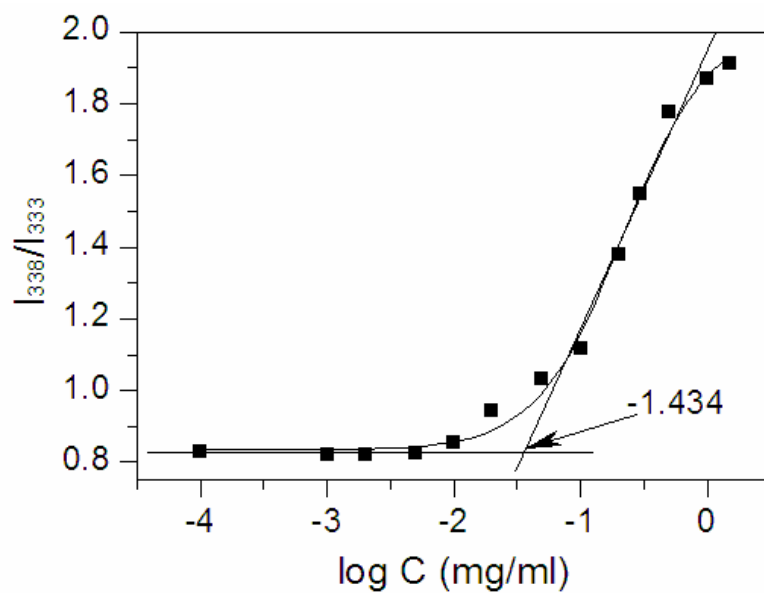

**Fig. S3.** Plot of the intensity ratio  $I_{338}/I_{333}$  (from pyrene excitation spectra of NFCHGC micelles) as a function of  $\log C$ .

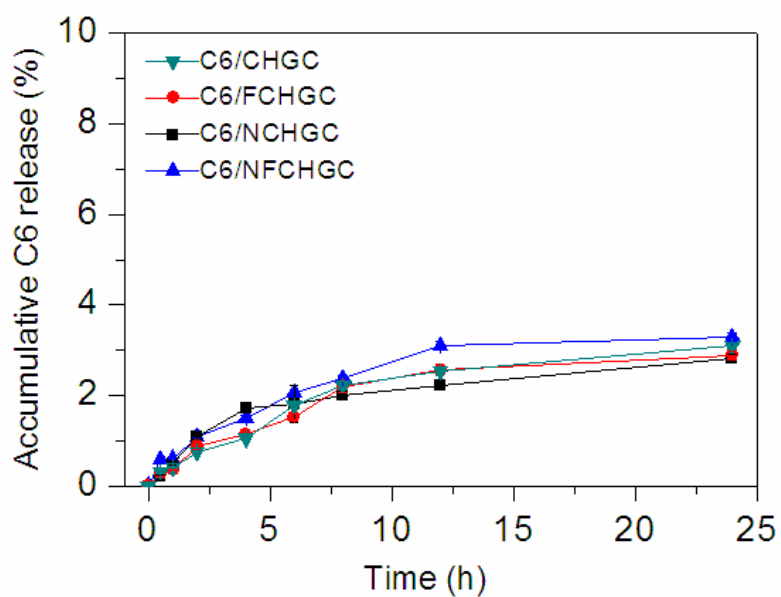

**Fig. S4.** Release profiles of C6 from C6/CHGC, C6/FCHGC, C6/NCHGC and C6/NFCHGC micelles at 37 °C in PBS at pH 7.4.

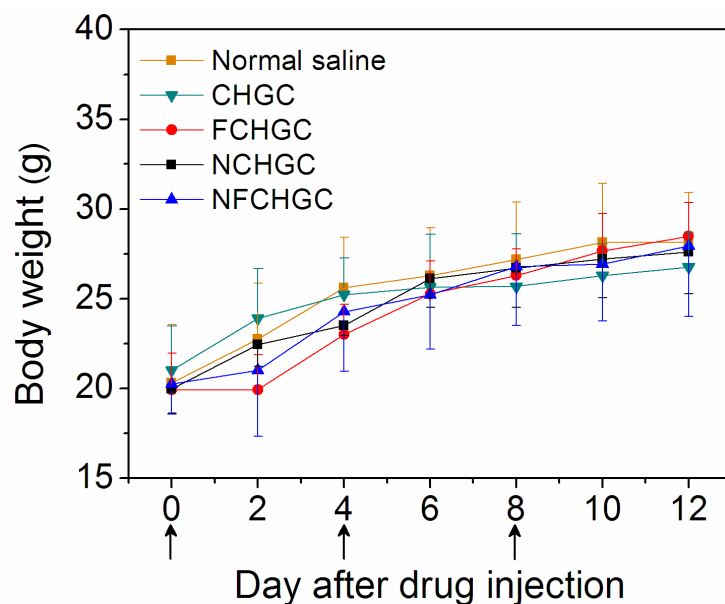

**Fig. S5.** Body weight change of Kunming mice after intravenous injection of normal saline solution, CHGC, FCHGC, NCHGC or NFCHGC micelles ( $n=8$ ).
